# Supplementary material
Source: PubMed Central journal article supplement (PMC7033017)
Supplement: NIHMS1069503-supplement-supp_info.pdf [file NIHMS1069503-supplement-supp_info.pdf]

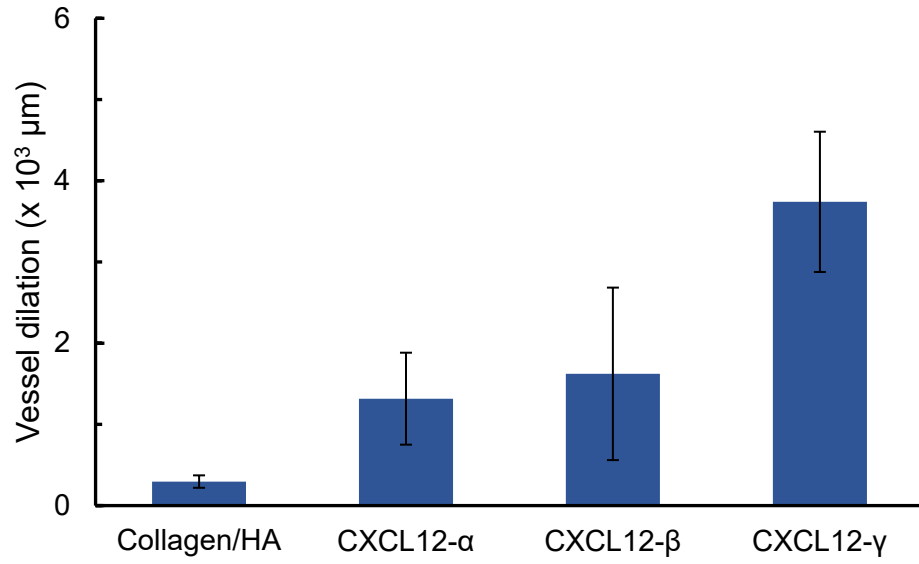

**Figure S1:** Vessel dialation mediated by CXCL12 isoforms in collagen/HA matrices. The data were expressed as mean  $\pm$  standard error (S.E.M).

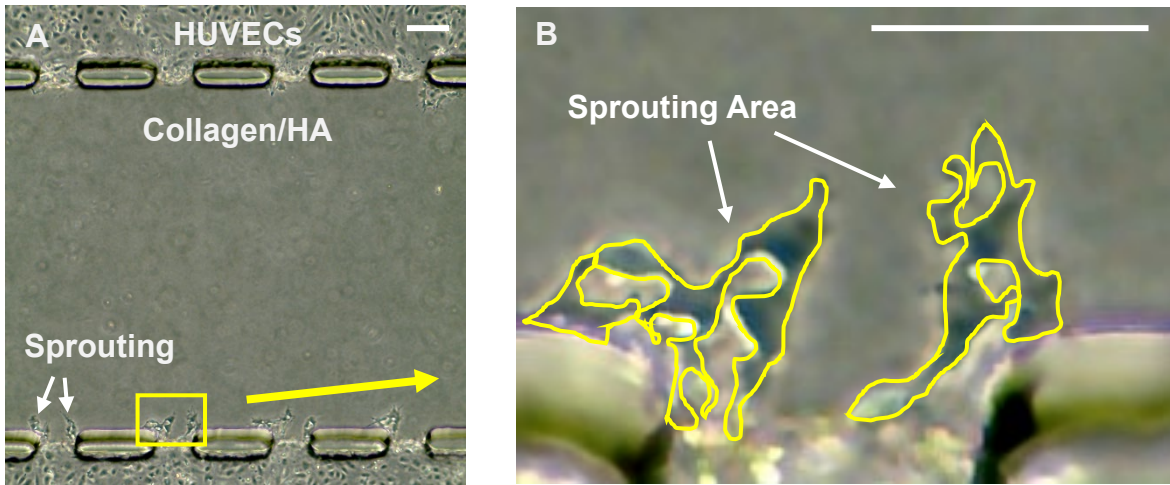

**Figure S2: Quantifying HUVEC sprouting angiogenesis.** (A) HUVECs sprouting into collagen/HA ECM. (B) Zoomed-in image of yellow box region showing area tracing of HUVEC sprouts. Scale bar = 100  $\mu\text{m}$ .

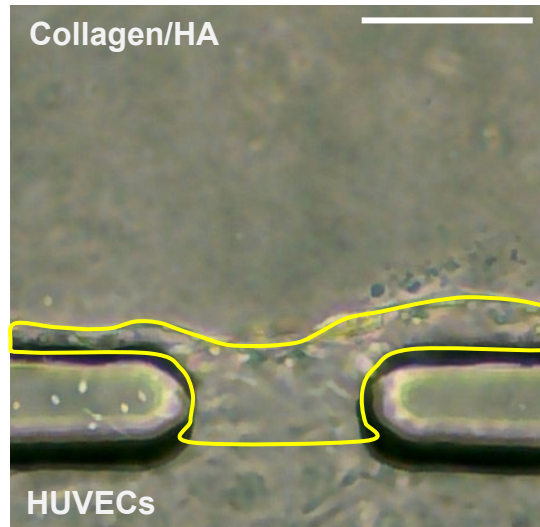

**Figure S3: Quantifying area behind HUVEC monolayer.** Yellow region represents area displacement of HUVECs monolayer into collagen/HA matrices. Scale bar = 100  $\mu\text{m}$ .

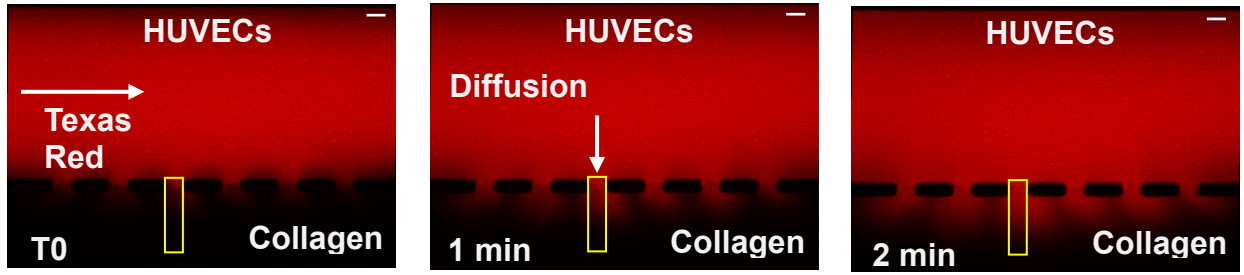

**Figure S4: Apparent vascular permeability assay.** Texas Red-labeled dextran diffused across HUVEC monolayer into collagen-only ECM channel. Intensity ( $I$ ) within the yellow boxed-in region was analyzed over time ( $t$ ) to determine a  $dI/dt$  value. Scale bar = 100  $\mu\text{m}$ .
